# Supplementary material for: P-167 当院における漏斗胸治療の現状と問題点
Source: Royal Society of Chemistry journal article supplement (doi:10.1039/b717647c), 2003-05-20
Supplement: b717647c.pdf [file b717647c.pdf]

### Supporting Information

#### Preparation of $[\text{Ag}([\text{18}] \text{aneS}_4\text{O}_2)]\text{PF}_6$

To a solution of  $[\text{18}] \text{aneS}_4\text{O}_2$  (49.2 mg, 0.15 mmol) in  $\text{CH}_2\text{Cl}_2$  (5 mL) was added slowly a solution of  $\text{AgPF}_6$  (38 mg, 0.15 mmol) in  $\text{CH}_3\text{OH}$  (3 mL). The reaction mixture was stirred at room temperature for 30 mins and diethyl ether (100 mL) added to afford a white precipitate. The solid was collected and dissolved in  $\text{CH}_3\text{CN}$  (1 mL), which was layered with diethyl ether in a thin tube at  $-20^\circ\text{C}$  to yield  $[\text{Ag}([\text{18}] \text{aneS}_4\text{O}_2)]\text{PF}_6 \cdot \text{CH}_3\text{CN}$  as colourless crystals. Yield 74.6mg, 80%. Anal. Calcd for  $\text{C}_{14}\text{H}_{27}\text{S}_4\text{O}_2\text{NPF}_6\text{Ag}$ : C, 27.01; H, 4.37; N, 2.25. Found: C, 26.85; H, 4.22; N, 2.17. IR (KBr,  $\text{cm}^{-1}$ ): 2957 (w), 2930 (w), 2919 (w), 2889 (m), 2859 (m), 2786 (w), 2254 (w), 1477 (w), 1421 (m), 1394 (w), 1358 (w), 1285 (w), 1204 (m), 1136 (m), 1110 (s), 1045 (m), 1005 (w), 852-831 (vs, broad), 721 (m), 651 (w), 560 (s). M.S. (ES):  $m/z$  437 for  $[\text{Ag}([\text{18}] \text{aneS}_4\text{O}_2)]^+$  with correct isotopic distribution.

#### Electrochemical generation and electrocrystallisation of $[\text{Ag}([\text{18}] \text{aneS}_4\text{O}_2)](\text{PF}_6)_2$

In an optically transparent electrochemical (OTE) quartz cell ( $40 \times 10 \times 0.5 \text{ mm}^3$ ) equipped with a Pt/Rh gauze working electrode, a Pt wire secondary electrode and a saturated calomel electrode (Fig. S1), the Ag(I) complex  $[\text{Ag}([\text{18}] \text{aneS}_4\text{O}_2)]\text{PF}_6 \cdot \text{CH}_3\text{CN}$  (2 mg,  $3.2 \times 10^{-3}$  mmol) in  $\text{CH}_2\text{Cl}_2$  (1.5 mL) containing  $\text{NBu}_4\text{PF}_6$  (0.4 M) was oxidised by controlled potential electrolysis at +1.12 V vs.  $\text{Fc}^+/\text{Fc}$  at  $-20^\circ\text{C}$  under  $\text{N}_2$ . Blue needle crystals suitable for X-ray crystallographic analysis were deposited on the surface of working electrode over 1 h. Yield 2.4 mg, 92%. Uv-vis (in  $\text{CH}_3\text{CN}$ ) [ $\lambda_{\text{max}}(\epsilon_{\text{max}})$ ]: 574 nm ( $3083 \text{ L mol}^{-1} \text{ cm}^{-1}$ , broad).

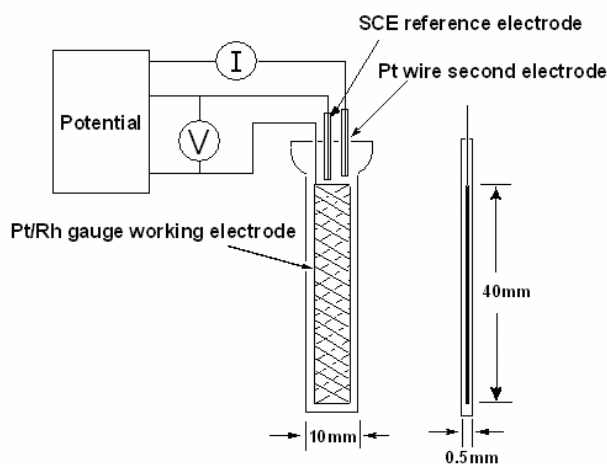

Figure S1: View of electrocrystallisation system

**X-ray single crystal structure determination of [Ag([18]aneS<sub>4</sub>O<sub>2</sub>)]PF<sub>6</sub>·CH<sub>3</sub>CN**

A colourless lath crystal (0.43 × 0.10 × 0.03 mm<sup>3</sup>) was coated with Fomblin perfluoropolyether (YR-1800; Lancaster Synthesis) and mounted on a glass fibre for data collection using the Bruker SMART 1000 CCD area detector in Nottingham. The wavelength used was 0.71073 Å.

**Crystal data** C<sub>14</sub>H<sub>27</sub>NO<sub>2</sub>S<sub>4</sub>PF<sub>6</sub>Ag, *M* = 622.45, Orthorhombic, *a* = 21.0076(4), *b* = 17.5973(6), *c* = 12.5610(7) Å, *V* = 4643.5(3) Å<sup>3</sup>, *T* = 150(2) K, space group *Pna*2<sub>1</sub>, *Z* = 8, *D<sub>c</sub>* = 1.781 g/cm<sup>3</sup>, 11085 unique reflections (*R*<sub>int</sub> = 0.0282). One carbon atom in macrocycle ring was disordered to two anisotropic atoms of C29 and C29', but attempts to develop a disorder model for its adjacent carbon atom of C30 failed. The four hydrogen atoms on these two carbon atoms were not included in the refinement model. In addition, five fluorine atoms in one PF<sub>6</sub><sup>-</sup> anion were disordered to two anisotropic atoms, but the sixth fluorine was refined as ordered. All non-hydrogen atoms were refined with anisotropic displacement parameters except for those of disordered atoms. Hydrogen atoms were located by geometrically calculation except for the hydrogen atoms on C29 and C29' and C30. Application of disorder modelling and distance restraints led to stable refinement. Final *R*<sub>1</sub>[*F* > 2σ(*F*)] = 0.030, *wR*<sub>2</sub> (all data) = 0.0705.

**X-ray single crystal structure determination of [Ag([18]aneS<sub>4</sub>O<sub>2</sub>)](PF<sub>6</sub>)<sub>2</sub>·CH<sub>2</sub>Cl<sub>2</sub>**

A blue needle crystal (0.13 × 0.015 × 0.015 mm<sup>3</sup>) was coated with Fomblin perfluoropolyether (YR-1800; Lancaster Synthesis) and mounted on a glass fibre for data collection using the Bruker SMART APEXII diffractometer on Station 16.2smx of the Daresbury Synchrotron Radiation Source. The wavelength used was 0.7848 Å.

**Crystal data** C<sub>13</sub>H<sub>26</sub>O<sub>2</sub>S<sub>4</sub>Cl<sub>2</sub>P<sub>2</sub>F<sub>12</sub>Ag, *M* = 811.29, monoclinic, *a* = 11.190(2), *b* = 10.510(2), *c* = 22.990(5) Å, β = 91.00(3), *V* = 2703.4(9) Å<sup>3</sup>, *T* = 150(2) K, space group *P2*<sub>1</sub>/*n* (*alt.* *P2*<sub>1</sub>/*c*, no. 14), *Z* = 4, *D<sub>c</sub>* = 1.993 g/cm<sup>3</sup>, 4733 unique reflections (*R*<sub>int</sub> = 0.177). Data were truncated to 2θ = 50° due to lack of diffraction intensity beyond this limit. Atoms C3, C5, C6, C8, C12, C14, C15, C17 and C18 in the macrocyclic ring and the two chlorine atoms (Cl1, Cl2) of the CH<sub>2</sub>Cl<sub>2</sub> solvent molecule all exhibited strongly elongated ellipsoids and their *U*<sub>eq</sub> values were all much higher than those of adjacent atoms. Therefore, each of these atoms was modelled as disordered over two half-occupied positions, resulting in final *U*<sub>eq</sub> values of less than 0.10 Å<sup>2</sup>. The H atoms of the CH<sub>2</sub>Cl<sub>2</sub> were not included in the model. Distance restraints were applied to all macrocyclic C–C, C–O and C–S bonds, to the P–F bonds in the PF<sub>6</sub> anion and to the C–Cl bonds in the CH<sub>2</sub>Cl<sub>2</sub> solvent molecule. Application of disorder modelling and distance restraints led to stable refinement. Final *R*<sub>1</sub>[*F* > 4σ(*F*)] = 0.0944, *wR*<sub>2</sub> (all data) = 0.251.

**Selected bond lengths (Å) and angles (°) of [Ag([18]aneS<sub>4</sub>O<sub>2</sub>)]<sup>+</sup>**

|           |          |             |           |
|-----------|----------|-------------|-----------|
| Ag1...O1  | 3.092(3) | S4-Ag1-S7   | 85.44(4)  |
| Ag1-S4    | 2.574(6) | S4-Ag1-S13  | 113.39(4) |
| Ag1-S7    | 2.609(4) | S4-Ag1-S16  | 132.99(3) |
| Ag1...O10 | 3.022(3) | S7-Ag1-S13  | 135.30(3) |
| Ag1-S13   | 2.574(5) | S7-Ag1-S16  | 111.31(4) |
| Ag1-S16   | 2.572(4) | S13-Ag1-S16 | 85.72(4)  |

**Selected bond lengths (Å) and angles (°) of [Ag([18]aneS<sub>4</sub>O<sub>2</sub>)]<sup>2+</sup>.**

|           |           |             |            |
|-----------|-----------|-------------|------------|
| Ag1...O1  | 2.814(9)  | S4-Ag1-S7   | 84.33(1)   |
| Ag1-S4    | 2.487(4)  | S4-Ag1-S13  | 168.18(2)  |
| Ag1-S7    | 2.537(4)  | S4-Ag1-S16  | 93.51(14)  |
| Ag1...O10 | 2.797(10) | S7-Ag1-S13  | 94.88(13)  |
| Ag1-S13   | 2.501(4)  | S7-Ag1-S16  | 168.01(15) |
| Ag1-S16   | 2.518(4)  | S13-Ag1-S16 | 84.81(14)  |

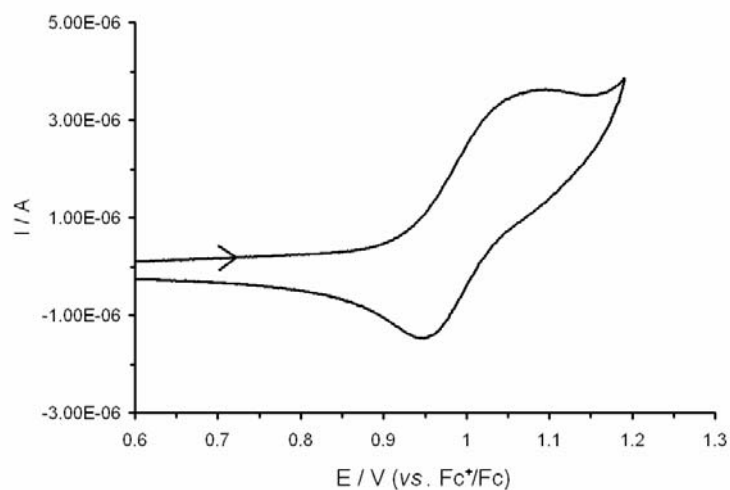

Figure S3: The cyclic voltammogram of  $[\text{Ag}([\text{18}] \text{aneS}_4\text{O}_2)]\text{PF}_6$  in  $\text{CH}_2\text{Cl}_2$  (0.4 M  $\text{NBu}_4\text{PF}_6$ ) at a scan rate of  $100 \text{ mV s}^{-1}$  (253 K).

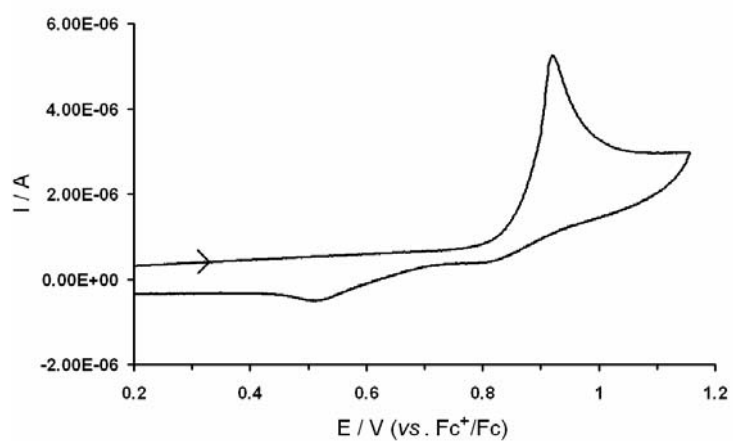

Figure S4: Cyclic voltammogram of  $[\text{Ag}([\text{18}] \text{aneS}_6)]\text{PF}_6$  in  $\text{CH}_2\text{Cl}_2$  containing  $\text{NBu}_4\text{PF}_6$  (0.4 M) at 253 K at a scan rate of  $100 \text{ mV/s}$ .

### EPR Spectroscopy and Simulation

The Q- and S-band frozen EPR spectra of  $[\text{Ag}([\text{18}] \text{aneS}_4\text{O}_2)]^{2+}$  specie was recorded at the Manchester EPR centre on a Bruker ESP 300E spectrometer. The X-band fluid and frozen spectra were recorded on a Bruker EMX EPR spectrometer. All the frozen solutions were kept cooled at a temperature of *ca.*125 K by an Oxford cooling device throughout the experiments. All the EPR simulations of Ag(II) spectra were performed using Simfornia package<sup>1</sup> in Nottingham.

### EPR theoretical calculation

The axial EPR spectra of  $[\text{Ag}([\text{18}] \text{aneS}_4\text{O}_2)]^{2+}$  are consistent with the approximate square-planar molecular structure determined by X-ray crystallography. Thus, the *z*-axis was defined as being perpendicular to the  $\text{S}_4$  plane with  $g_{\parallel}$  and  $A_{\parallel}$  lying along this axis, with the *x*-axis defined as pointing along the bisector of the S(4)-Ag(1)-S(16) angle. Thus, crystal field theory predicts a  $4d_{xy}$ -based SOMO in  $[\text{Ag}([\text{18}] \text{aneS}_4\text{O}_2)]^{2+}$  consistent with the observed  $g_{\parallel} > g_{\perp} > g_e$  pattern in the EPR spectra of the complex. For this case perturbation theory, where  $g_{11} = g_{22} = g_{xx} = g_{yy}$ ,  $g_{33} = g_{zz}$ ,  $A_{11} = A_{22} = A_{xx} = A_{yy}$  and  $A_{33} = A_{zz}$ , gives for  $\Delta g_{ii}$  and  $A_{ii}$  ( $i = x, y, z$ ):<sup>2</sup>

$$\Delta g_{xx} = 2\lambda/\delta_{yz} = g_{xx} - g_e \quad (1)$$

$$\Delta g_{yy} = 2\lambda/\delta_{xz} = g_{yy} - g_e \quad (2)$$

$$\Delta g_{zz} = 8\lambda/\delta_{x^2-y^2} = g_{zz} - g_e \quad (3)$$

$$A_{xx} = A_s + P_d[2\alpha^2/7 + \Delta g_{xx} - 3\Delta g_{yy}/14] \quad (4)$$

$$A_{yy} = A_s + P_d[2\alpha^2/7 + \Delta g_{yy} - 3\Delta g_{xx}/14] \quad (5)$$

$$A_{zz} = A_s + P_d[-4\alpha^2/7 + \Delta g_{zz} + 3(\Delta g_{xx} + \Delta g_{yy})/14] \quad (6)$$

where  $g_e$  is the *g*-value of the free electron 2.00232,  $\lambda$  is the spin-orbit coupling constant for Ag(II),  $\delta_{ij}$  is the weighted average energy difference between the ground and excited states,  $\alpha$  is the LCAO coefficient of the Ag ( $4d_{xy}$ ) orbital in the SOMO,  $A_s$  is the isotropic Fermi contact term and  $P_d$  is the electron-nuclear dipolar coupling parameter for Ag(II), which was calculated as  $-74.7 \times 10^{-4} \text{ cm}^{-1}$  using Rieger's methodology.<sup>3</sup> A combination of equations (1) - (6) gives:

$$A_{zz} = \langle A \rangle + P_d[-4\alpha^2/7 + 2\Delta g_{zz}/3 - 5(\Delta g_{xx} + \Delta g_{yy})/42] \quad (7) \quad \text{where } \langle A \rangle = (A_{xx} + A_{yy} + A_{zz})/3$$

Solution of (7) with the simulated *g* and *A*-values from the multi-frequency EPR spectra gave  $\alpha^2 = 22.7\%$  with  $A_{zz} \equiv A_{\parallel}$  and  $g_{zz} = g_{\parallel}$ . Negative *A*-values gave invalid negative values for  $\alpha^2$ .

Thus, the contribution of  $4d_{xy}$  metal orbital to the SOMO is 22.7% as determined by multi-frequency EPR spectroscopy.

### DFT Calculations

The calculations were performed using the Amsterdam Density Functional (ADF) suite version 2005.01.<sup>4,5</sup> The unrestricted scalar relativistic DFT calculations employed a Slater type orbital (STO) triple- $\zeta$ -plus one polarization function basis set from the ZORA/TZP database of the ADF suite for all atoms. The cores were frozen up to and including  $2p$  for S,  $1s$  for C and O and  $3d$  for Ag, respectively. The local density approximation (LDA) with the correlation potential due to Vosko *et al*<sup>6</sup> was used in all of the DFT calculations. Gradient corrections were performed using the functionals of Becke<sup>7</sup> and Perdew (BP).<sup>8</sup> A model of  $[\text{Ag}[\text{18}] \text{aneS}_4\text{O}_2]^{2+}$  was constructed using geometrical data from the X-ray crystal structure and were optimised without any constraints on symmetry.

### Geometry Optimised Coordinates for $[\text{Ag}([\text{18}] \text{aneS}_4\text{O}_2)]^{2+}$

|    |          |          |          |
|----|----------|----------|----------|
| Ag | 0.00000  | 0.00000  | 0.00000  |
| O  | -1.66175 | 0.10182  | -2.10540 |
| C  | -2.51445 | -1.05672 | -2.27095 |
| H  | -1.91800 | -1.78777 | -2.83225 |
| H  | -3.39576 | -0.80516 | -2.88208 |
| C  | -2.99032 | -1.64541 | -0.94216 |
| H  | -3.48173 | -2.61713 | -1.10267 |
| H  | -3.71624 | -0.99619 | -0.43302 |
| S  | -1.68910 | -1.89962 | 0.34143  |
| C  | -0.67173 | -3.29176 | -0.32972 |
| H  | -1.26767 | -4.20959 | -0.21223 |
| H  | -0.47449 | -3.12494 | -1.39515 |
| C  | 0.61455  | -3.40609 | 0.48209  |
| H  | 1.22460  | -4.24725 | 0.12537  |
| H  | 0.39926  | -3.58764 | 1.54511  |
| S  | 1.70508  | -1.90851 | 0.52213  |
| C  | 2.77611  | -2.02353 | -0.98394 |
| H  | 3.68731  | -1.49311 | -0.67334 |
| H  | 3.04895  | -3.08150 | -1.11288 |
| C  | 2.20743  | -1.45178 | -2.28445 |
| H  | 3.01394  | -1.41090 | -3.03401 |
| H  | 1.40978  | -2.09074 | -2.68313 |
| O  | 1.60477  | -0.14587 | -2.12520 |
| C  | 2.41066  | 1.03560  | -2.35206 |
| H  | 1.76215  | 1.73700  | -2.89248 |
| H  | 3.26596  | 0.80027  | -3.00538 |
| C  | 2.93688  | 1.66271  | -1.06012 |
| H  | 3.39382  | 2.64277  | -1.26420 |

|   |          |         |          |
|---|----------|---------|----------|
| H | 3.70497  | 1.04251 | -0.57750 |
| S | 1.69293  | 1.90851 | 0.28114  |
| C | 0.65154  | 3.30780 | -0.33829 |
| H | 1.24462  | 4.22598 | -0.21039 |
| H | 0.43677  | 3.16514 | -1.40412 |
| C | -0.62054 | 3.39857 | 0.49780  |
| H | -1.23786 | 4.24713 | 0.17281  |
| H | -0.38814 | 3.55369 | 1.56129  |
| S | -1.70892 | 1.89962 | 0.51880  |
| C | -2.77710 | 2.03043 | -0.98898 |
| H | -3.70605 | 1.53463 | -0.67351 |
| H | -3.01397 | 3.09483 | -1.13259 |
| C | -2.22611 | 1.42196 | -2.28106 |
| H | -3.03383 | 1.39492 | -3.03024 |
| H | -1.40918 | 2.02970 | -2.68821 |

### References

1. WINEPR SimFonia, version 1.25 and WINEPR System, version 2.11, 1996; Bruker Analytische Messtechnik GmbH, Germany.
2. P. H. Rieger, *Cood. Chem. Rev.*, 1994, **135/136**, 203.
3. P. H. Rieger, *J. Magn. Reson.*, 1997, **124**, 140.
4. C. F. Guerra, J. G. Snijders, G. te Velde and E. J. Baerends. *Theor. Chem. Acc.*, 1998, **99**, 391.
5. G. te Velde, F. M. Bickelhaupt, S. J. A. van Gisbergen, C. F. Guerra, E. J. Baerends, J. G. Snijders and T. Ziegler. *J. Comput. Chem.*, 2001, **22**, 931.
6. S. H. Vosko, L. Wilk and M. Nusair. *Can. J. Phys.*, 1980, **58**, 1200.
7. A. D. Becke *Phys. Rev. A*, 1988, **38**, 3098.
8. J. P. Perdew *Phys. Rev. B*, 1986, **33**, 8822.
